# Supplementary material for: VEGF blockade enhances the antitumor effect of BRAFV 600E inhibition
Source: PubMed Central journal article supplement (PMC5286370; doi:10.15252/emmm.201505774), 2016-12-14

**Appendix** Comunanza V et al. (EMM-2015-05774)

- Appendix Supplementary Legends
- Appendix Supplementary Tables S1 to S6
- Appendix Supplementary Figure S1 to S6

## Appendix Supplementary Figure Legends

### Appendix Figure S1. Effect of the combination of PLX4720 and bevacizumab on apoptosis of A375 cells transplanted in athymic nude mice.

Representative images of tumor cell apoptosis determined by immunofluorescence staining with M30-cytodeath antibody in A375 xenografts treated as indicated. Bar graphs indicate the M30<sup>+</sup> area/tumor area (n= 3 tumors), \*\*\*P = < 0.001 versus vehicle (P = 9.71E-05).

The scale bars represent 50  $\mu\text{m}$ . The results are given as the mean  $\pm$  SEM. Significance was assessed by one-way ANOVA test followed by post-hoc pairwise analysis test.

### Appendix Figure S2. Vascular response of COLO205 and A375 xenograft tumors to PLX4720 and bevacizumab.

(A) Representative images of vasculature determined by CD31 immunofluorescence staining in COLO205 xenografts treated as indicated. Bar graphs indicate quantitative micro vessel density (MVD) and micro vessel area (MVA) analysis (n=6 tumors), \*P < 0.05, \*\*P < 0.01, \*\*\*P < 0.001 versus vehicle (MVD: PLX4720 P = 0.0002; bevacizumab P = 0.025; COMBO P = 4.48E-09) (MVA: PLX4720 P = 0.0080 ; bevacizumab P = 0.046 ; COMBO P = 0.025).

(B) Histogram showing the vessel size distribution in A375 xenografts treated as indicated (n=6 tumors) \*P < 0.05, \*\*P < 0.01, \*\*\*P < 0.001 versus vehicle (<100  $\mu\text{m}^2$ : PLX4720 P = 0.001, COMBO P = 0.017), (500-600  $\mu\text{m}^2$  : PLX4720 P = 0.022, COMBO P = 0.028), (>600  $\mu\text{m}^2$  : PLX4720 P = 0.00058, COMBO P = 0.0032).

(C) Representative images of pericyte coverage determined by CD31 (green) and NG2 (red) immunofluorescence co-staining in A375 xenografts treated as indicated. Bar graphs indicate the CD31<sup>+</sup>NG2<sup>+</sup>area/tumor area in A375 xenografts (n=5 tumors).

The scale bars represent 100  $\mu\text{m}$  in (A) and 50  $\mu\text{m}$  in (C). The results are given as the mean  $\pm$  SEM. Significance was assessed by one-way ANOVA test followed by post-hoc pairwise analysis test (A-B-C).

**Appendix Figure S3. Transcriptional profiling of Human genes in A375 xenografts in response to PLX4720, bevacizumab and COMBO.**

(A) Heatmap showing unsupervised hierarchical clustering of human differentially expressed modulated genes in the vehicle, PLX4720, bevacizumab and COMBO treatments in A375 melanoma xenograft tumors.

(B) Volcano plots of human gene expression showing fold-change and p-value for the comparison of PLX4720 (*left*), bevacizumab (*middle*) and COMBO (*right*) treatments versus vehicle. Up-regulated and down-regulated genes are colored red and blue, respectively.

(C) Summary of the functional categories of human genes significantly enriched in response to PLX4720 and COMBO. GO analyses were performed individually on down- or up-regulated genes using DAVID tools (biological process). GO terms are ranked by p-value corrected by BH method, and the number of genes is indicated. For a complete list of significantly enriched GO groups, see Tables SI-SII.

**Appendix Figure S4. Transcriptional profiling of murine genes in A375 xenografts in response to PLX4720, bevacizumab and COMBO.**

(A) Heatmap showing unsupervised hierarchical clustering of murine differentially modulated genes in the vehicle, PLX4720, bevacizumab and COMBO treatments in A375 melanoma xenograft tumors.

(B) Modulation of genes related to angiogenesis after bevacizumab treatment by microarray analysis.

(C) Quantitative PCR analysis of the expression of angiogenesis-related genes in bevacizumab-treated tumors in A375 xenografts. The data are presented as the mean  $\pm$  SEM of expression fold-change ( $\log_2$ ) compared with vehicle after normalization to the housekeeping gene (n=3), \*P < 0.05; \*\*P < 0.01; \*\*\*P < 0.001 versus vehicle (Pecam P = 0.026; Flt-1 P = 0.036; Cdh55 P = 0.0021; Pdgfb P = 0.0029; Col4a1 P = 0.018; Col4a2 P = 0.0030; Hey P = 5.31E-05; Ptn P = 0.00019).

(D) Volcano plots of murine gene expression showing fold-change and p-value for the comparison of PLX4720 (*left*), bevacizumab (*middle*) and COMBO (*right*) treatments versus vehicle. Up-regulated and down-regulated genes are colored red and blue, respectively.

(E) Heatmap representation of gene expression changes within the “Reactome Cytokine” “Signaling in Immune System”, “Innate Immune System” gene set. Genes in heatmaps are shown in rows and samples in columns. Expression level is represented as a gradient from

high (red) to low (blue). V, P, B and C respectively indicate vehicle, PLX4720, bevacizumab and COMBO.

(F) IPA interaction networks of “Immune Response” and “ECM remodeling” modulated genes comparing COMBO- and vehicle-treated tumors. The solid lines correspond with all direct interactions in the IPA database. The dashed lines represent indirect interactions. Genes that were either up-regulated (red nodes) or down-regulated (blue nodes) are integrated in the signaling network.

### **Appendix Figure S5. Analysis of myeloid subpopulations in A375 xenografts.**

(A) Analysis of h-GMCSF and TNFA gene expression. Real time quantitative PCR of tumors treated with PLX4720, bevacizumab or COMBO. The data are presented as the mean  $\pm$  SEM of the fold change in expression ( $\log_2$ ) compared with vehicle after normalization for the housekeeping gene TBP (n=3), \*P < 0.05; \*\*P < 0.01 (h-GMCSF: PLX4720 P = 0.0038, COMBO P = 0.0040; hTNFA: PLX4720 P = 0.016, COMBO P = 0.0018).

(B) Representative images of NEMs in a vehicle-treated A375 xenograft determined by CD11b, Nrp1 and Gr1 immunofluorescence staining. Bar graph indicate CD11b<sup>+</sup> Gr1<sup>+</sup>Nrp1<sup>+</sup> area/tumor area in xenografts treated as indicated (n = 5 tumors), \*\*\*P < 0.001 versus vehicle (P = 1.56E-05)

The scale bars represent 50  $\mu$ m in (B). The results are given as the mean  $\pm$  SEM. Significance was assessed by and Student's *t*-test (A) and one-way ANOVA test followed by post-hoc pairwise analysis test (B).

### **Appendix Figure S6. Effect of long-term treatment of A375 xenografts with PLX4720, bevacizumab or COMBO.**

(A) Mice bearing established A375 were treated with vehicle (n=5), PLX4720 (n=6) bevacizumab (n=5) or COMBO (n=6) for 6 weeks. Tumor growth is expressed as % change of the initial tumor, \*P < 0.05, \*\*P < 0.01 \*\*\*P < 0.001 versus vehicle (PLX4720: 2 week P = 0.0009; 3 week P = 0.014), (COMBO: 2 week P = 6.27E-05; 3 week P = 0.0006; 4 week P = 0.0020; 5 week P = 0.030).

(B) Representative images of a responder COMBO-treated tumor sections co-stained with an antibody against CD68 and an antibody anti-CCR7 (M1-like polarization) or anti-C206 (M2-like polarization).



(C) Analysis of the expression of h-GMCSF in COMBO-responder and -relapsing mice. The data are presented as the mean  $\pm$  SEM of expression fold change ( $\log_2$ ) compared with vehicle after normalization to the housekeeping gene TBP (n=3), \*P < 0.05 (P = 0.017).

(D) Representative images of vasculature determined by CD31 immunofluorescence staining in a responder and a relapsing A375 xenografts. Bar graphs indicate quantitative micro vessel area (MVA) analysis (n=3 tumors).

(E) Representative images of hypoxia marker pimonidazole in a responder and a relapsing A375 xenografts. Bar graphs indicate the % of tumor hypoxic area (n=3 tumors), \*\*P < 0.01 versus COMBO responders (P = 0.0062).

The scale bar represents 50  $\mu$ m in (B) and 100  $\mu$ m in (D-E). The results are presented as the mean value  $\pm$  SEM. Significance was assessed by one-way ANOVA test followed by post-hoc pairwise analysis test (A) and Student's t-test (C-D-E).

**Appendix Table S1. Gene Ontology analysis for Human genes highly modulated by PLX4720.**

| <b>Up-Modulated</b>   |                                                 |                                                                                                                                                                                                       |                                 |
|-----------------------|-------------------------------------------------|-------------------------------------------------------------------------------------------------------------------------------------------------------------------------------------------------------|---------------------------------|
| <b>Category</b>       | <b>GO Term</b>                                  | <b>Genes</b>                                                                                                                                                                                          | <b>p value<br/>BH corrected</b> |
| <b>GOTERM_BP_FAT</b>  | GO:0006955 immune response                      | CXCL1, IFIH1, CCL2, ENPP2, IFITM2, IFITM3, OAS3, RSAD2, IFI44L, OAS1, OAS2, HLA-DMA, IFI35, CXCL10, CFH, SEMA3C, CFI, DHX58, BST2, IL8, PRG4, HLA-B, TRIM22, PSMB9, DDX58, OASL, IL18BP, CXCL16, IFI6 | 5.56E-08                        |
| <b>GOTERM_BP_FAT</b>  | GO:0009615 response to virus                    | DDX58, IFIH1, BST2, ISG15, IRF7, RSAD2, MX1, TRIM22, IFI35, STAT2                                                                                                                                     | 5.28E-04                        |
| <b>GOTERM_BP_FAT</b>  | GO:0009611 response to wounding                 | PLAT, CXCL1, A2M, CCL2, IL8, AIF1, TNC, COL3A1, NINJ2, TGFB3, BDKRB1, EPHA3, CXCL10, NUPR1, IRF7, CFH, VCAN, ID3, CFI                                                                                 | 0.001030                        |
| <b>GOTERM_BP_FAT</b>  | GO:0006952 defense response                     | CXCL1, A2M, IFIH1, CCL2, IL8, AIF1, RSAD2, BDKRB1, HLA-B, EPHA3, CXCL10, DDX58, NUPR1, CXCL16, IRF7, CFH, CFI, MX1, DHX58, GNG7                                                                       | 0.00158                         |
| <b>GOTERM_BP_FAT</b>  | GO:0030198 extracellular matrix organization    | LUM, COL3A1, COL1A2, OLFML2A, POSTN, DCN, COL1A1, EMILIN1                                                                                                                                             | 0.0134                          |
| <b>GOTERM_BP_FAT</b>  | GO:0043062 extracellular structure organization | TNC, LUM, COL3A1, COL1A2, OLFML2A, POSTN, DCN, COL1A1, EMILIN1                                                                                                                                        | 0.03061                         |
| <b>GOTERM_BP_FAT</b>  | GO:0022610 biological adhesion                  | SVEP1, CCL2, TNC, COL22A1, COL3A1, NINJ2, MGP, POSTN, PCDH7, EMILIN1, VCAM1, LAMA4, COL6A3, VCAN, COL8A1, THBS2, BOC, CDH10                                                                           | 0.04327                         |
| <b>GOTERM_BP_FAT</b>  | GO:0006954 inflammatory response                | CXCL1, A2M, CCL2, NUPR1, IL8, AIF1, IRF7, CFH, BDKRB1, CFI, CXCL10, EPHA3                                                                                                                             | 0.04359                         |
| <b>GOTERM_BP_FAT</b>  | GO:0007155 cell adhesion                        | SVEP1, CCL2, TNC, COL22A1, COL3A1, NINJ2, MGP, POSTN, PCDH7, EMILIN1, VCAM1, LAMA4, COL6A3, VCAN, COL8A1, THBS2, BOC, CDH10                                                                           | 0.04777                         |
| <b>Down-Modulated</b> |                                                 |                                                                                                                                                                                                       |                                 |
| <b>Category</b>       | <b>GO Term</b>                                  | <b>Genes</b>                                                                                                                                                                                          | <b>p value<br/>BH corrected</b> |

|                      |                                             |                                                         |          |
|----------------------|---------------------------------------------|---------------------------------------------------------|----------|
| <b>GOTERM_BP_FAT</b> | GO:0019318 hexose metabolic process         | GALK2, IRS2, GBE1, ATF3, PFKFB4, ALDOC, HK2, ENO2, PGK1 | 1.89E-02 |
| <b>GOTERM_BP_FAT</b> | GO:0005996 monosaccharide metabolic process | GALK2, IRS2, GBE1, ATF3, PFKFB4, ALDOC, HK2, ENO2, PGK1 | 2.66E-02 |
| <b>GOTERM_BP_FAT</b> | GO:0001666 response to hypoxia              | ADM, ALDOC, VEGFA, BNIP3, CITED2, VLDLR, DDIT4          | 0.0490   |
| <b>GOTERM_BP_FAT</b> | GO:0070482 response to oxygen levels        | ADM, ALDOC, VEGFA, BNIP3, CITED2, VLDLR, DDIT4          | 0.04855  |

**Appendix Table S2. Gene Ontology analysis for Human genes highly modulated by COMBO.**

| <b>Up-Modulated</b>   |                                               |                                                                                                                                                                                                        |                                 |
|-----------------------|-----------------------------------------------|--------------------------------------------------------------------------------------------------------------------------------------------------------------------------------------------------------|---------------------------------|
| <b>Category</b>       | <b>GO Term</b>                                | <b>Genes</b>                                                                                                                                                                                           | <b>p value<br/>BH corrected</b> |
| <b>GOTERM_BP_FAT</b>  | GO:0006955<br>immune response                 | CXCL1, CSF2, IFIH1, CCL2, ENPP2, RSAD2, IFI44L, OAS1, OAS2, HLA-DMA, IFI35, CXCL10, LOC100133678, HLA-DRB4, CFH, CFI, DHX58, IL8, BST2, CFB, PRG4, TRIM22, HLA-DQA1, OASL, IL18BP, GBP2, IFI6, HLA-DRA | 1.37E-08                        |
| <b>GOTERM_BP_FAT</b>  | GO:0009615<br>response to virus               | PLSCR1, IFIH1, BST2, ISG15, IRF7, RSAD2, MX1, STAT1, TRIM22, IFI35, STAT2                                                                                                                              | 6.66E-06                        |
| <b>GOTERM_BP_FAT</b>  | GO:0006952<br>defense response                | CXCL1, IFIH1, A2M, CCL2, AIF1, RSAD2, CXCL10, CFH, SERPINA3, CFI, MX1, DHX58, GNG7, NFKBIZ, IL8, GAGE2A, CFB, GAGE2E, GAGE2B, GAGE12C, GAGE12B, EPHA3, IRF7, GAGE6, GAGE8, HLA-DRA                     | 9.10264E-05                     |
| <b>GOTERM_BP_FAT</b>  | GO:0009611<br>response to wounding            | CXCL1, NFKBIZ, A2M, CCL2, IL8, AIF1, ERBB3, CFB, COL3A1, EPHA3, CXCL10, PLSCR1, IRF7, SERPINA3, CFH, VCAN, ID3, CFI                                                                                    | 0.0001885                       |
| <b>GOTERM_BP_FAT</b>  | GO:0006954<br>inflammatory response           | CXCL1, NFKBIZ, A2M, CCL2, IL8, CFB, AIF1, EPHA3, CXCL10, IRF7, CFH, SERPINA3, CFI                                                                                                                      | 0.001845                        |
| <b>GOTERM_BP_FAT</b>  | GO:0009612<br>response to mechanical stimulus | CCL2, MGP, RCAN1, COL1A1, STAT1, MMP13                                                                                                                                                                 | 0.01299                         |
| <b>Down-Modulated</b> |                                               |                                                                                                                                                                                                        |                                 |
| <b>Category</b>       | <b>GO Term</b>                                | <b>Genes</b>                                                                                                                                                                                           | <b>p value<br/>BH corrected</b> |
| <b>GOTERM_BP_FAT</b>  | GO:0070482<br>response to oxygen levels       | CA9, ADM, ANG, HMOX1, ALDOC, CITED2                                                                                                                                                                    | 1.64E-03                        |
| <b>GOTERM_BP_FAT</b>  | GO:0001666<br>response to hypoxia             | CA9, ADM, ANG, HMOX1, ALDOC, CITED2                                                                                                                                                                    | 2.55E-03                        |
| <b>GOTERM_BP_FAT</b>  | GO:0009719<br>response to endogenous stimulus | IRS2, CA9, ADM, ANG, HMOX1, ALDOC, ENO2                                                                                                                                                                | 0.01596                         |
| <b>GOTERM_BP_FAT</b>  | GO:0010033<br>response to organic             | IRS2, CA9, ADM, ANG, HMOX1, ALDOC, ENO2, HSPA6                                                                                                                                                         | 0.03828                         |

substance

**Appendix Table S3. Gene Ontology analysis for Mouse genes highly modulated by PLX4720**

**Down-Modulated**

| Category      | GO Term                               | Genes                                                                                                               | p value<br>BH corrected |
|---------------|---------------------------------------|---------------------------------------------------------------------------------------------------------------------|-------------------------|
| GOTERM_BP_FAT | GO:0001525 angiogenesis               | RTN4, EMCN, PDGFA, PGF, CSPG4, VASH1, MAP3K7, OVOL2, VEGFA, HBEGF, RBPJ, ANGPT2, POFUT1                             | 2.23E-02                |
| GOTERM_BP_FAT | GO:0048514 blood vessel morphogenesis | RTN4, EMCN, PGF, PDGFA, PRRX1, CSPG4, VASH1, CITED2, MAP3K7, OVOL2, VEGFA, HBEGF, FOXC1, RBPJ, ANGPT2, POFUT1       | 3.72E-02                |
| GOTERM_BP_FAT | GO:0001944 vasculature development    | RTN4, EMCN, TBX3, PGF, PDGFA, PRRX1, CSPG4, VASH1, CITED2, MAP3K7, OVOL2, VEGFA, HBEGF, FOXC1, RBPJ, ANGPT2, POFUT1 | 0.03856                 |
| GOTERM_BP_FAT | GO:0001568 blood vessel development   | RTN4, EMCN, TBX3, PGF, PDGFA, PRRX1, CSPG4, VASH1, CITED2, MAP3K7, OVOL2, VEGFA, HBEGF, FOXC1, RBPJ, ANGPT2, POFUT1 | 0.03879                 |

**Appendix Table S4. Gene Ontology analysis for Mouse genes highly modulated by COMBO.**

| <b>Up-Modulated</b>   |                                                                       |                                                                                                                                                                                                                |                                 |
|-----------------------|-----------------------------------------------------------------------|----------------------------------------------------------------------------------------------------------------------------------------------------------------------------------------------------------------|---------------------------------|
| <b>Category</b>       | <b>GO Term</b>                                                        | <b>Genes</b>                                                                                                                                                                                                   | <b>p value<br/>BH corrected</b> |
| GOTERM_BP_FAT         | GO:0006955<br>immune response                                         | CIITA, GBP6, CD8B1, C3, H2-M2, LY86, IL18, H2-D1, TLR2, SAMHD1, IGH-6, OAS2, CCL5, H2-Q7, PSMB9, OSM, PSEN2, IL1B, XCL1, CFD, LTB, CD14, H28                                                                   | 6.74E-08                        |
| GOTERM_BP_FAT         | GO:0001819<br>positive regulation of cytokine production              | CD83, IL18, KLRE1, TLR2, IL1B, H2-Q7, CD14                                                                                                                                                                     | 5.05E-03                        |
| GOTERM_BP_FAT         | GO:0051240<br>positive regulation of multicellular organismal process | CD83, SLC1A3, IL18, PSEN2, KLRE1, TLR2, IL1B, H2-Q7, LTB, CD14                                                                                                                                                 | 5.62E-03                        |
| GOTERM_BP_FAT         | GO:0010033<br>response to organic substance                           | CIITA, GATM, TLR2, STAT1, CCL5, ADIPOQ, CD48, FOS, CD83, SLC1A3, APOE, IL1B, SORT1, NFE2L2, CD14, NR1H3                                                                                                        | 6.72E-03                        |
| GOTERM_BP_FAT         | GO:0009611<br>response to wounding                                    | CIITA, GATM, NFKBID, C3, LY86, TLR2, NINJ1, CHI3L3, CCL5, SLC1A3, IL1B, CFD, CD14                                                                                                                              | 8.63E-03                        |
| GOTERM_BP_FAT         | GO:0006954<br>inflammatory response                                   | CIITA, NFKBID, C3, LY86, TLR2, IL1B, CHI3L3, CFD, CCL5, CD14                                                                                                                                                   | 2.32E-02                        |
| GOTERM_BP_FAT         | GO:0001817<br>regulation of cytokine production                       | CD83, IL18, KLRE1, TLR2, IL1B, H2-Q7, LTB, CD14                                                                                                                                                                | 2.81E-02                        |
| GOTERM_BP_FAT         | GO:0002684<br>positive regulation of immune system process            | CD83, C3, IL18, PSEN2, KLRE1, TLR2, IGH-6, CFD, H2-Q7                                                                                                                                                          | 4.99E-02                        |
| <b>Down-Modulated</b> |                                                                       |                                                                                                                                                                                                                |                                 |
| <b>Category</b>       | <b>GO Term</b>                                                        | <b>Genes</b>                                                                                                                                                                                                   | <b>p value<br/>BH corrected</b> |
| GOTERM_BP_FAT         | GO:0022610<br>biological adhesion                                     | AEBP1, EMCN, BCAR1, TNC, FERMT2, CLDN5, CDH5, VCL, PCDH1, COL6A2, COL6A1, ESAM, COL18A1, ICAM2, COL15A1, HSPG2, PCDH12, ITGA3, NID1, NID2, MCAM, COL5A1, NCAM1, VWF, CDH13, ITGA5, CPXM1, PECAM1, LAMC1, PARVB | 7.09E-10                        |
| GOTERM_BP_FAT         | GO:0007155 cell adhesion                                              | AEBP1, EMCN, BCAR1, TNC, FERMT2, CLDN5, CDH5, VCL, PCDH1, COL6A2, COL6A1, ESAM, COL18A1, ICAM2, COL15A1, HSPG2, PCDH12, ITGA3, NID1, NID2, MCAM, COL5A1, NCAM1, VWF, CDH13, ITGA5, CPXM1, PECAM1, LAMC1, PARVB | 1.36E-09                        |

|                      |                                         |                                                                                                                                            |          |
|----------------------|-----------------------------------------|--------------------------------------------------------------------------------------------------------------------------------------------|----------|
| <b>GOTERM_BP_FAT</b> | GO:0001568 blood vessel development     | COL18A1, EMCN, FLT1, EGFL7, PGF, GJA1, CDH5, COL5A1, CITED2, MAP3K7, VEGFC, HMOX1, NOTCH4, ROBO4, NOS3, SOX18, COL1A1, LOX, PLXND1, ANGPT2 | 4.99E-09 |
| <b>GOTERM_BP_FAT</b> | GO:0001944 vasculature development      | COL18A1, EMCN, FLT1, EGFL7, PGF, GJA1, CDH5, COL5A1, CITED2, MAP3K7, VEGFC, HMOX1, NOTCH4, ROBO4, NOS3, SOX18, COL1A1, LOX, PLXND1, ANGPT2 | 5.73E-09 |
| <b>GOTERM_BP_FAT</b> | GO:0001525 angiogenesis                 | COL18A1, EMCN, FLT1, EGFL7, PGF, MAP3K7, VEGFC, HMOX1, NOTCH4, ROBO4, NOS3, SOX18, PLXND1, ANGPT2                                          | 3.71E-07 |
| <b>GOTERM_BP_FAT</b> | GO:0048514 blood vessel morphogenesis   | COL18A1, EMCN, FLT1, EGFL7, PGF, GJA1, CITED2, MAP3K7, VEGFC, HMOX1, NOTCH4, ROBO4, NOS3, SOX18, PLXND1, ANGPT2                            | 5.84E-07 |
| <b>GOTERM_BP_FAT</b> | GO:0051270 regulation of cell motion    | COL18A1, KISS1, ACTN4, EGFL7, SEMA3F, BCAR1, PECAM1, ROBO4, TIE1, VCL                                                                      | 3.29E-04 |
| <b>GOTERM_BP_FAT</b> | GO:0030334 regulation of cell migration | COL18A1, KISS1, EGFL7, BCAR1, PECAM1, ROBO4, TIE1, VCL                                                                                     | 7.69E-03 |



**Appendix Table S5. Top 5 Upstream Regulators selectively characterizing COMBO treatment, predicted by Upstream Regulators Analysis in IPA.**

| Upstream Regulator        | Molecule Type | Predicted Activation State | p value of overlap | Target molecules in dataset                                                                                                                                                                                                                                                                                                                                                                                                                       |
|---------------------------|---------------|----------------------------|--------------------|---------------------------------------------------------------------------------------------------------------------------------------------------------------------------------------------------------------------------------------------------------------------------------------------------------------------------------------------------------------------------------------------------------------------------------------------------|
| <b>TNF</b>                | cytokine      |                            | 3,01E-33           | ACKR2,AEBP1,APOE,CD14,CDC42EP5,CDH5, CDO1,CFD,CIIITA,COL15A1,COL1A1,CYP2E1, EDNRB,EFNA1,EMP1,ESM1,F2RL1,F2RL3,FP R2,FSCN1,GJA1,GPD2,GPR176,HLA- A,HMOX1,HP,HSD17B7,HSPA1A/HSPA1B,HS PA4,HSPG2,ICAM2,IFIT3,IL10RA,IL1B,ITGA5,L AMC1,LOX,LTB,MCAM,NCAM1,NFE2L2,NID1, NINJ1,NME3,NOS3,NOTCH4,NR1H3,OSM,PD E4B,PECAM1,PHLDA1,PLAT,PLK2,PPAP2A,P PP1R3C,PSMB9,RABEP2,RARRES2,RGS1,RO BO1,SEPP1,SPARC,STAT1,TIE1,TLR2,TNC, T WIST2,USP2,VCL,VEGFC,WNT5A |
| <b>TGFB1</b>              | growth factor | Inhibited                  | 2,14E-29           | ACKR2,ACTA2,ACTG2,ANKRD1,APOE,CCRL2 ,CD14,CDH5,CIIITA,COL18A1,COL1A1,COL4A1 ,COL4A2,COL5A1,COL6A1,COL6A2,COL6A3,C PXM1,DLL3,EDNRB,ESAM,ESM1,F2RL1,FAM1 10B,FERMT2,FLT1,FPR2,FSCN1,GATM,GJA1, GPRC5B,HMOX1,HOXA2,HS6ST2,HSPA1A/HS PA1B,HSPG2,ICAM2,IFIT3,IL10RA,IL1B,IMPDH 1,ITGA3,ITGA5,LAMC1,LOX,NCAM1,NOS3,NR 1H3,OSM,PECAM1,PILRA,PLAT,PLK2,PPP1R3 C,PTPRK,RAMP2,SAMHD1,SEMA7A,SMTN,SP ARC,STAT1,TLR2,TNC,TPM1,TWIST2,VCL,VE GFC,WNT5A         |
| <b>lipopolysaccharide</b> | chemical drug |                            | 2,01E-23           | ABCC5,ACTA2,APOE,CCNL1,CCRL2,CD14,CD 276,CD33,CDH5,CFD,CIIITA,CLDN5,COL1A1,C OL4A1,COL4A2,COL5A1,COL6A1,CTSL,CYP2 E1,F2RL1,FLT1,FPR2,FSCN1,GJA1,H2- M2,HLA- A,HMOX1,HP,HSPA1A/HSPA1B,ICAM2,IFIT3,I L10RA,IL1B,ITGA5,LYZ,MYL9,NID1,NOS3,NR1 H3,OSM,PDE4B,PECAM1,PHLDA1,PLAT,PLK2                                                                                                                                                                   |

|                      |               |          |  |                                                                                                                                                                                                                                                                                                           |
|----------------------|---------------|----------|--|-----------------------------------------------------------------------------------------------------------------------------------------------------------------------------------------------------------------------------------------------------------------------------------------------------------|
|                      |               |          |  | ,PSMB9,RASL11A,RGS1,SATB1,SEPP1,SEPT1,SLCO2A1,SPARC,STAT1,TCAP,TLR2,TNC,TOR3A,VCL,VEGFC,XCL1                                                                                                                                                                                                              |
| <b>dexamethasone</b> | chemical drug | 9,41E-17 |  | ACTA2,ACTG2,ADRBK2,AEBP1,ANKRD1,APOE,BCAR1,CFD,CLDN5,COL15A1,COL1A1,COL4A1,COL4A2,COL6A1,COL6A2,CPE,CTSL,CYP2E1,EDNRB,EFNA1,F2RL1,GJA1,GPR65,HP,HS17B7,IFIT3,IL10RA,IL1B,ITGA5,LAMC1,LTB,NCAM1,NR1H3,OSM,PDE4B,PHLDA1,PLAT,PLK2,RGS1,SEPP1,SLCO2A1,SLCO2B1,SPARC,STAT1,TLR2,TNC,TPM1,VCL,VEGFC,WNT5A,XCL1 |
| <b>IL1B</b>          | cytokine      | 1,16E-15 |  | ACKR2,ACTA2,APOE,CCRL2,CD14,CIITA,COL1A1,CYP2E1,EFNA1,F2RL1,FLT1,FPR2,GJA1,HLA-A,HMOX1,HP,HSPA1A/HSPA1B,HSPG2,IFIT3,IL10RA,IL1B,ITGA5,LOX,NFE2L2,NOS3,NR1H3,OSM,PDE4B,PHLDA1,PLAT,PSMB9,SEPP1,SPARC,STAT1,TLR2,VEGFC                                                                                      |

**Appendix Table S6. Primers Used for Quantitative Real Time PCR Expression Analysis**

|                              |                             |                               |       |
|------------------------------|-----------------------------|-------------------------------|-------|
| <b>GM-CSF</b>                | 5'-GGGAGCATGTGAATGCCATC-3'  | 5'-GGCTCCTGGAGGTCAAACAT-3'    | Human |
| <b>TBP</b>                   | 5'-GTGACCCAGCATCACTGTTTC-3' | 5'-GAGCATCTCCAGCACACTCT-3'    | Human |
| <b>TNF</b>                   | 5'-CCCATGTTGTAGCAAACCCTC-3' | 5'-TATCTCTCAGCTCCACGCCA-3'    | Human |
| <b>TGFB1</b>                 | 5'- CGTGGAGGGGAAATTGAGGG-3' | 5'- CCGGTAGTGAACCCGTTGATG-3'  | Human |
| <b>Arg1</b>                  | 5'-TTTTAGGGTTACGGCCGGTG-3'  | 5'-CCTCGAGGCTGTCCTTTTGA-3'    | Mouse |
| <b>CCI5</b>                  | 5'-GACAGCACATGCATCTCCCA-3'  | 5'-GTGTCCGAGCCATATGGTGA-3'    | Mouse |
| <b>Cd40</b>                  | 5'-TTGTTGACAGCGGTCCATCT-3'  | 5'-TCTCAAGAGCTGTGCAGTGG-3'    | Mouse |
| <b>Cdh5</b>                  | 5'-CCTGAGGCAATCAACTGTGC-3'  | 5'-GGAGGAGCTGATCTTGTCCG-3'    | Mouse |
| <b>Col4a1</b>                | 5'-GGCCCTTCATTAGCAGGTGT-3'  | 5'-GTGAGGACCAACCGTTAGGG-3'    | Mouse |
| <b>Col4a2</b>                | 5'-CGGCGTAATCTCAAAGGCG-3'   | 5'-GGCCTCTGCTTCCTTTCTGT-3'    | Mouse |
| <b>Cxcl10</b>                | 5'-GAGAGACATCCCAGCCAAC-3'   | 5'-GGGATCCCTTGAGTCCCAC-3'     | Mouse |
| <b>Cxcl9</b>                 | 5'-TGGAGTTCGAGGAACCCTAGT-3' | 5'-TTGTAGTGGATCGTGCCTCG-3'    | Mouse |
| <b>Flt1</b>                  | 5'-TACCTCACCGTGCAAGGAAC-3'  | 5'-AAGGAGCCAAAAGAGGGTTCG-3'   | Mouse |
| <b>Hey1</b>                  | 5'-TGCAGTTAACTCCTCCTTGCC-3' | 5'-CGCCGAACTCAAGTTTCCATT-3'   | Mouse |
| <b>Il10</b>                  | 5'-GGCGCTGTCATCGATTTCTC-3'  | 5'-ATGGCCTTGTAGACACCTTGG-3'   | Mouse |
| <b>Il1<math>\beta</math></b> | 5'-TGCCACCTTTTGACAGTGATG-3' | 5'-TGATGTGCTGCTGCGAGATT-3'    | Mouse |
| <b>Nfkb1</b>                 | 5'-GGTCACCCATGGCACCATAA-3'  | 5'-GGGCCCTTCACCTTCAGTTT-3'    | Mouse |
| <b>Pdgfb</b>                 | 5'-GGAGTCGGCATGAATCGCT-3'   | 5'-GCCCCATCTTCATCTACGGA-3'    | Mouse |
| <b>Pecam</b>                 | 5'-AGCCAACAGCCATTACGGTTA-3' | 5'-AGCCTTCCGTTCTCTTGGTG-3'    | Mouse |
| <b>Ptn</b>                   | 5'-CCGCCTTGAAGACCAGAACT-3'  | 5'-TTTGA CTCCGCTTGAGGCTT-3'   | Mouse |
| <b>Stat1</b>                 | 5'-GATCGCTTGCCCAACTCTTG-3'  | 5'-ACTGTGACATCCTTGGGCTG-3'    | Mouse |
| <b>Tbp</b>                   | 5'-AGTGCCAGCATCACTATTTCA-3' | 5'-GCCCTGAGCATAAGGTGGAA-3'    | Mouse |
| <b>Tgfb1</b>                 | 5'-AGCTGCGCTTGACAGAGATTA-3' | 5'-AGCCCTGTATTCCGTCTCCT-3'    | Mouse |
| <b>Tlr2</b>                  | 5'-AAGGAGGTGCGGACTGTTTC-3'  | 5'-GAGATTTGACGCTTTGTCTGAGG-3' | Mouse |

caspase-cleaved  
cytokeratin 18  
/ DAPI

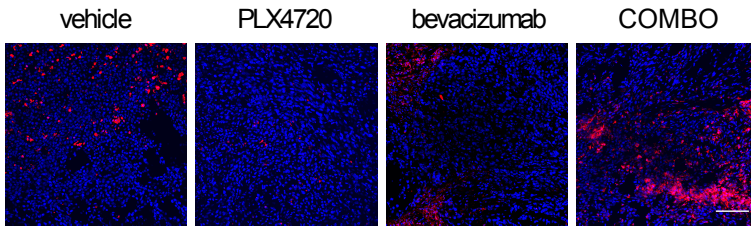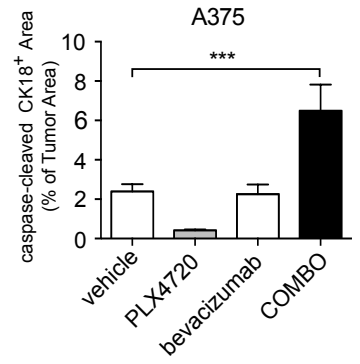

A

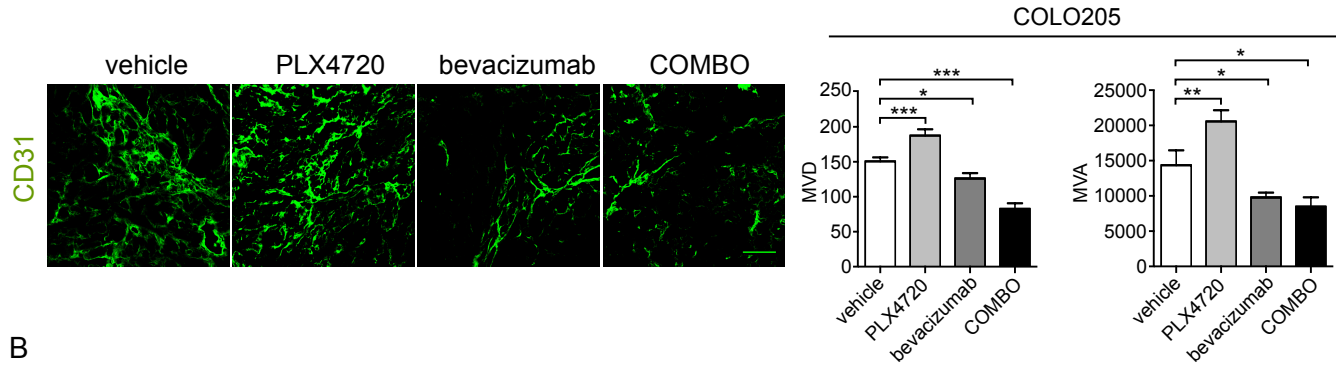

B

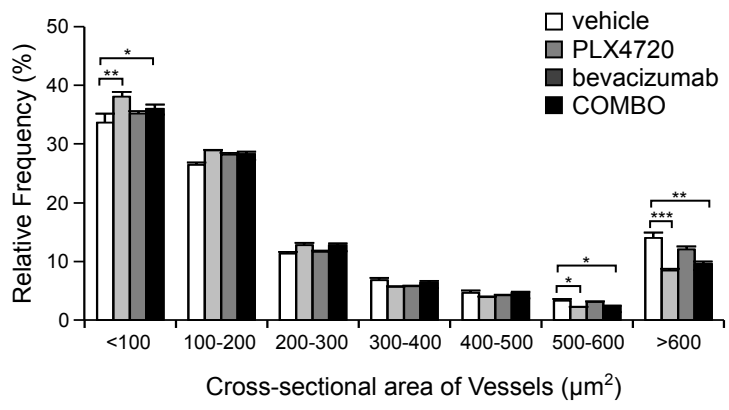

C

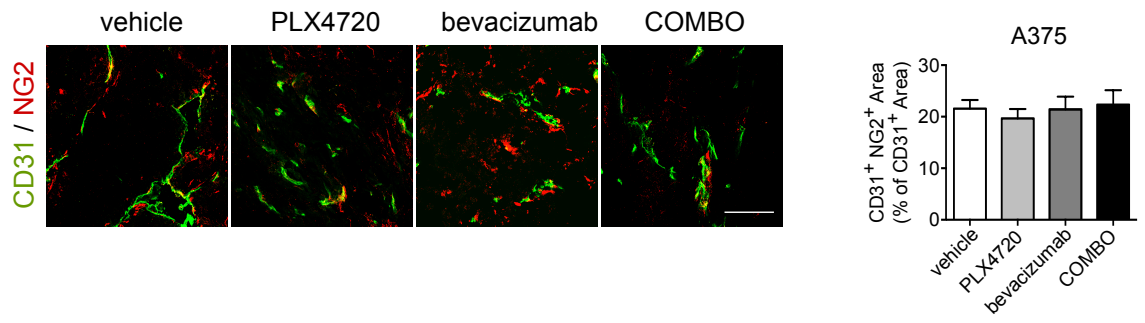

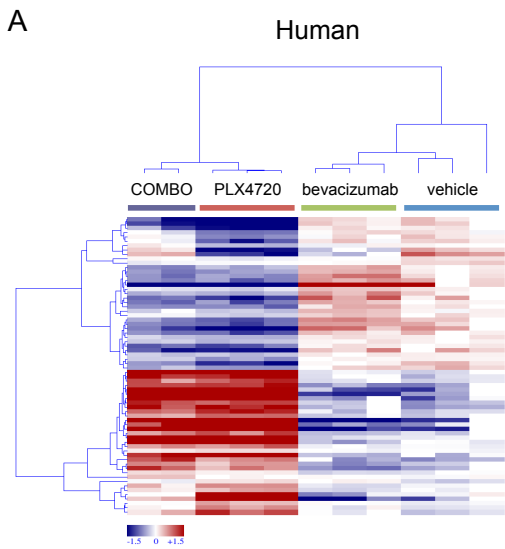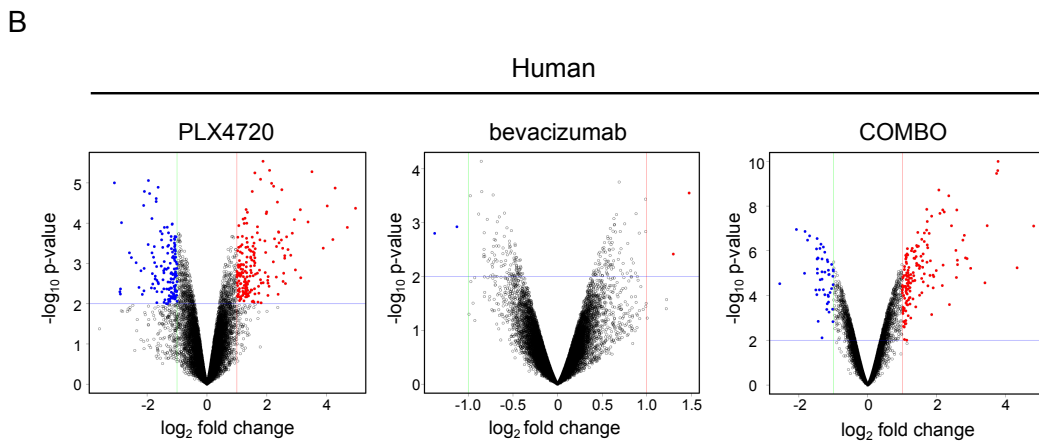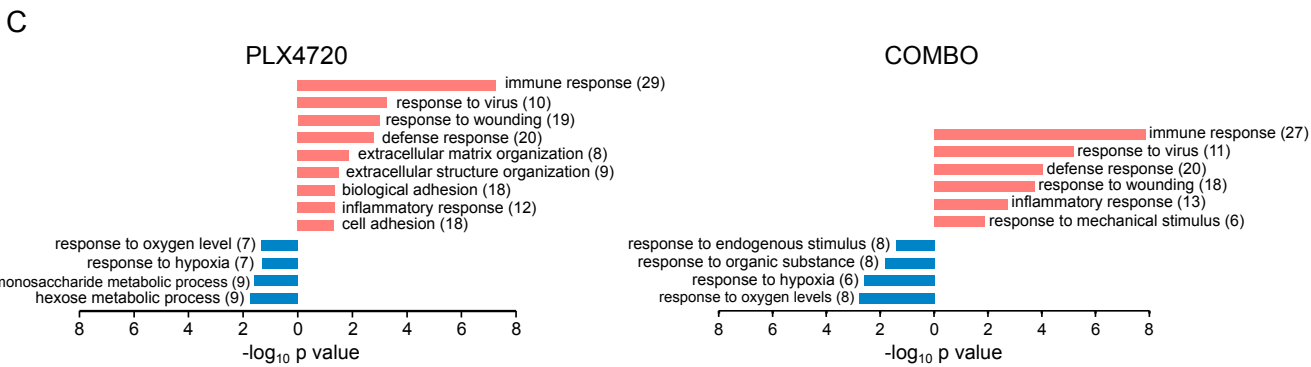

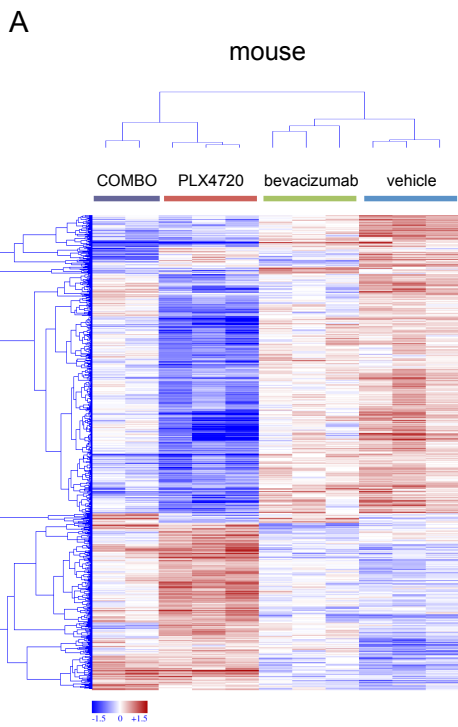

**B**

| Gene    | logFC | p value |
|---------|-------|---------|
| Ptn     | -1.28 | 0.00    |
| Flt1    | -0.86 | 0.00    |
| Pecam   | -0.74 | 0.00    |
| Col4a1  | -0.69 | 0.00    |
| Cdh5    | -0.79 | 0.00    |
| Sema3f  | -0.89 | 0.00    |
| Flt4    | -0.80 | 0.01    |
| Col18a1 | -0.58 | 0.01    |
| Col4a2  | -0.66 | 0.01    |
| Thbs1   | -0.79 | 0.02    |
| Hey1    | -0.51 | 0.03    |
| Pdgfb   | -0.48 | 0.03    |
| Hspg2   | -0.49 | 0.03    |
| Cxcl12  | 0.65  | 0.04    |
| Fst     | -0.62 | 0.04    |
| F2      | -0.41 | 0.04    |

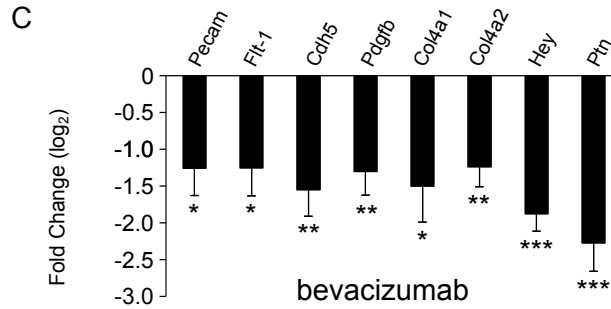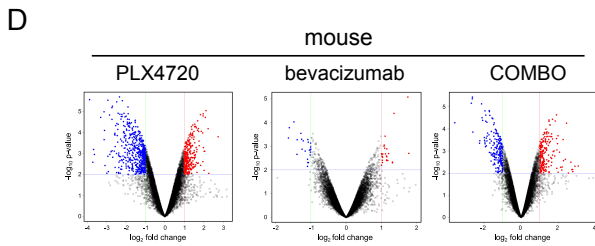

**E**

Reactome Cytokine Signaling  
in Immune System

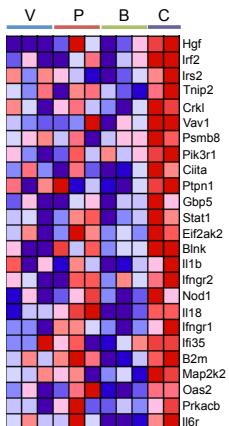

**F**

Immune Response

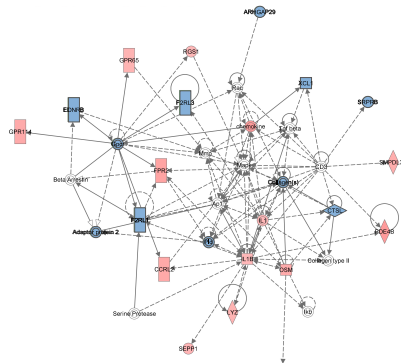

Extracellular Matrix Remodeling

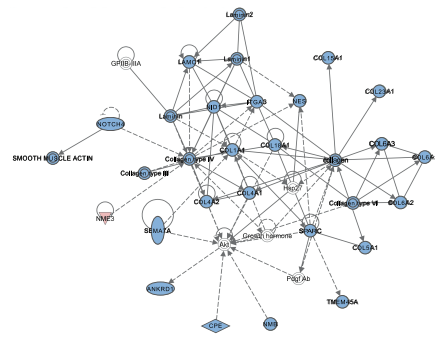

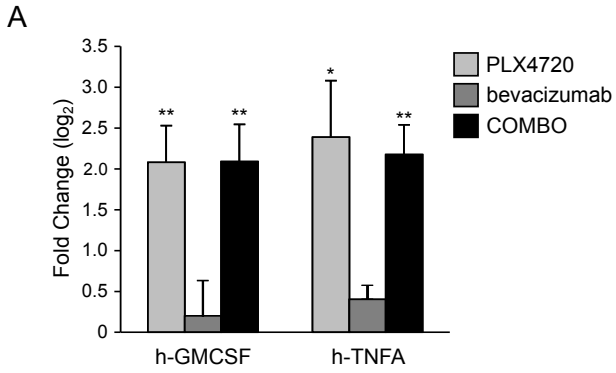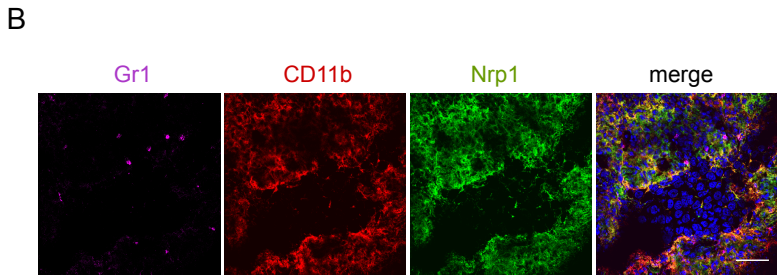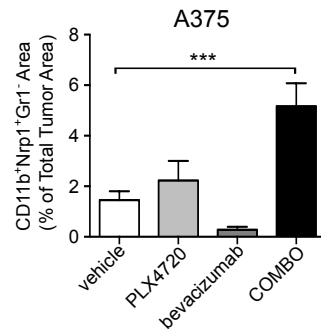



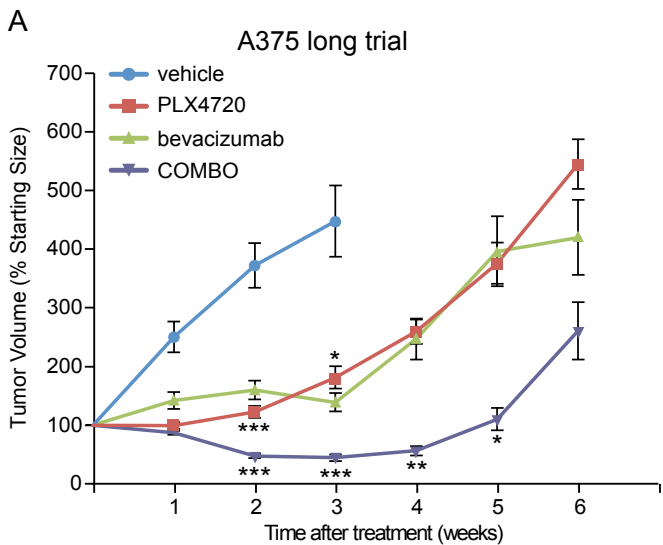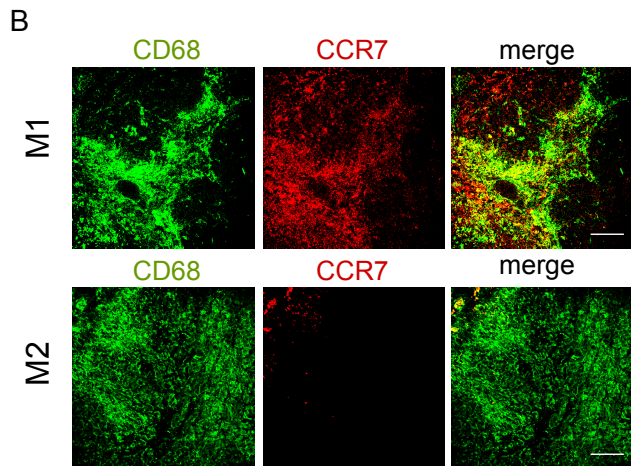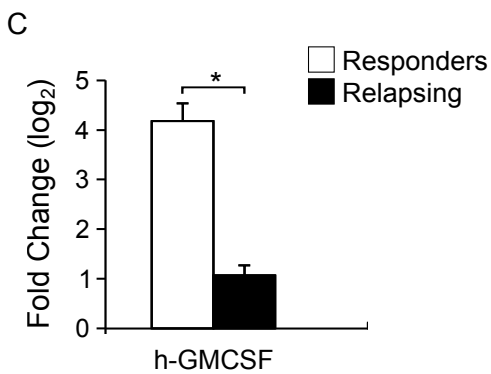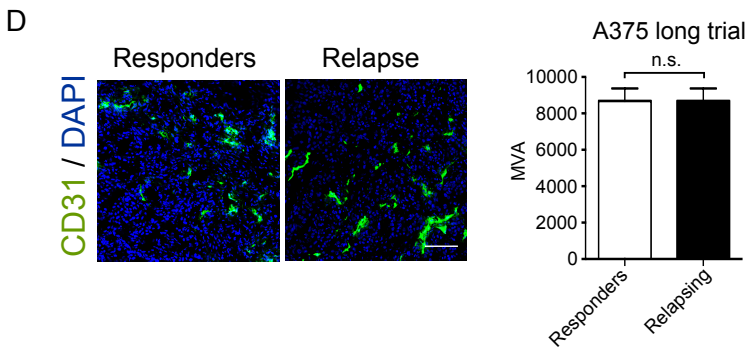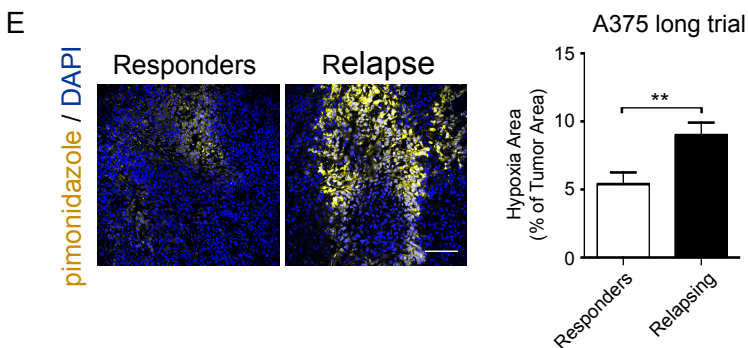

Supplement: EMMM-9-219-s001.pdf [file EMMM-9-219-s001.pdf]
