# Supplementary material for: VEGF blockade enhances the antitumor effect of BRAFV 600E inhibition
Source: PubMed Central journal article supplement (PMC5286370; doi:10.15252/emmm.201505774), 2016-12-14

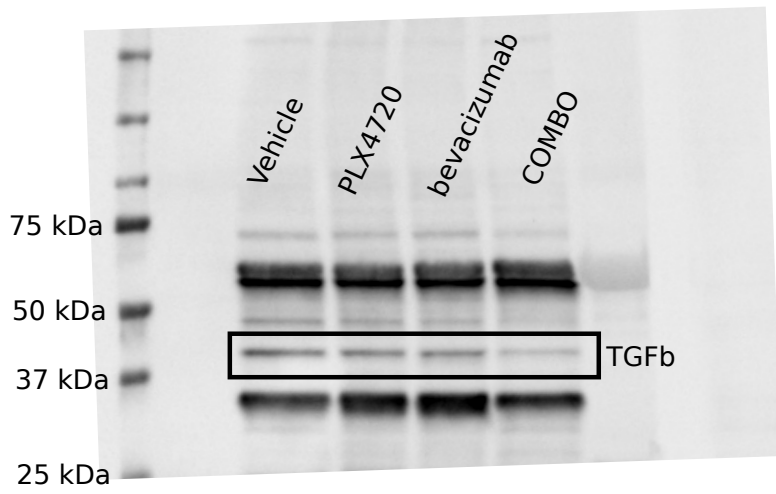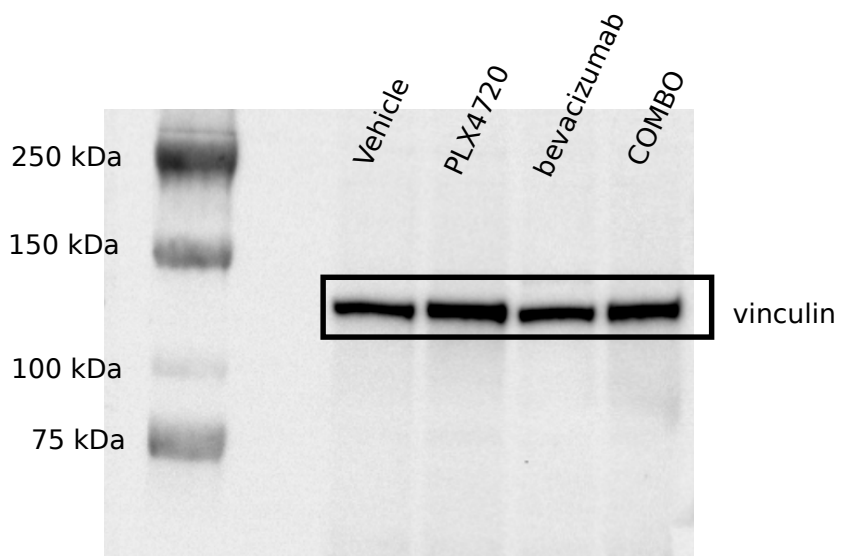

Supplement: EMMM-9-219-s002.pdf [file EMMM-9-219-s002.pdf]
